# Supplementary material for: Genome-wide association study of circulating vitamin D levels
Source: PubMed Central journal article supplement — Hum Mol Genet. 2010 Apr 23;19(13):2739–45. doi: 10.1093/hmg/ddq155 (PMC2883344; doi:10.1093/hmg/ddq155), 2010-04-23

**Supplementary Figure 1. LD structure of chromosome 4: This panel shows the trend P values for association testing with circulating 25-hydroxy vitamin D levels from SNPs in *GC* region (chromosome 4q12-13). LD plot is based on ATBC, CPS-II, CLUE II, and PLCO studies.**

**Supplementary Figure 2. LD structure of chromosome 11: This panel shows the trend P values for association testing with circulating 25-hydroxy vitamin D levels from SNPs in *NADSYN1* region (chromosome 11q13.4). LD plot is based on ATBC, CPS-II, CLUE II, and PLCO studies.**

**Supplementary Figure 3. LD structure of chromosome 11: This panel shows the trend P values for association testing with circulating 25-hydroxy vitamin D levels from SNPs in *CYP2R1* region (chromosome 11p15.2). LD plot is based on ATBC, CPS-II, CLUE II, and PLCO studies.**

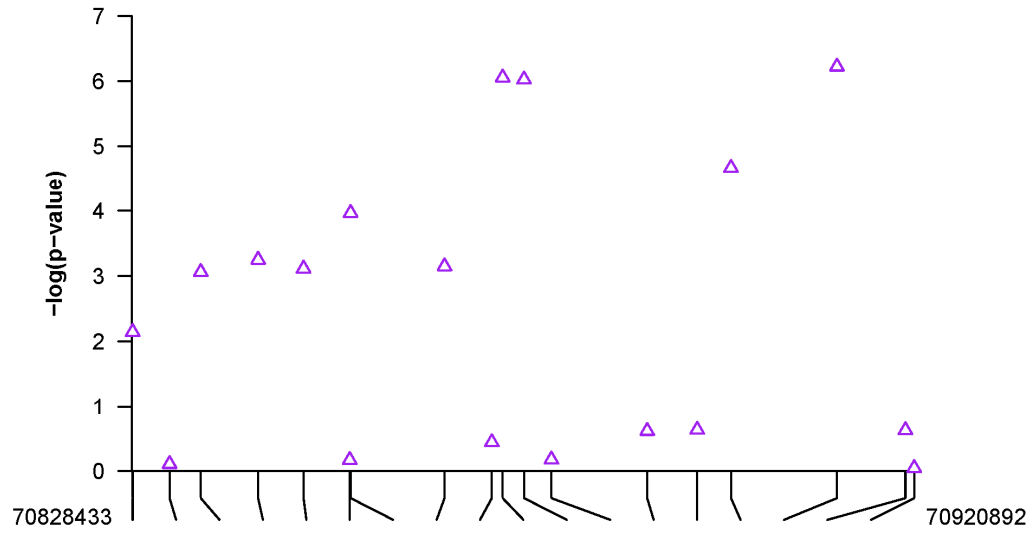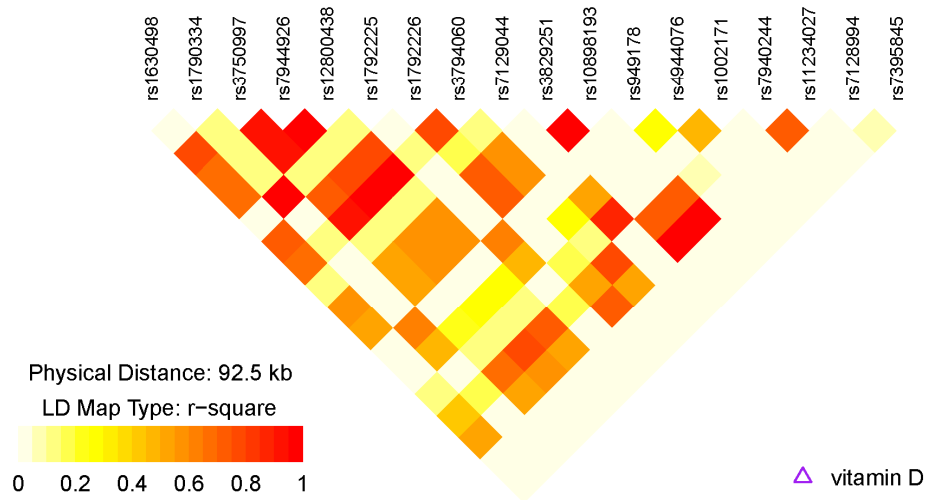

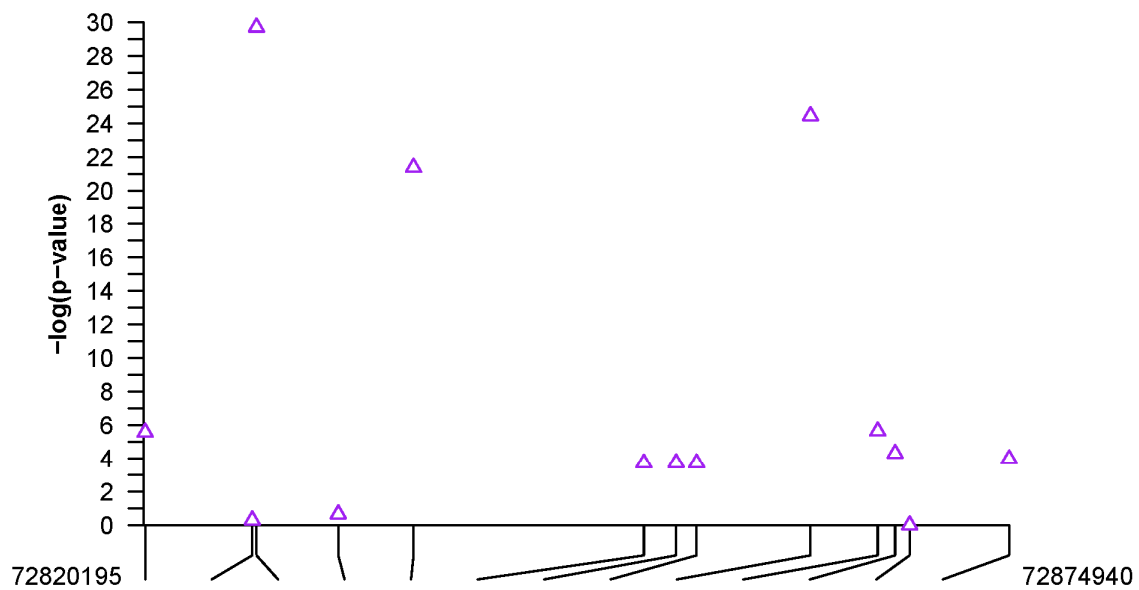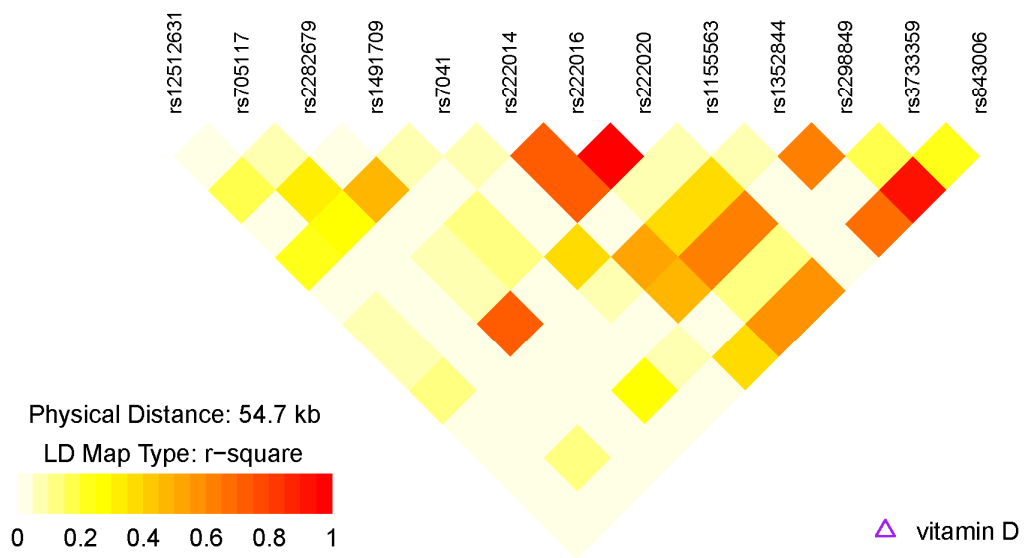

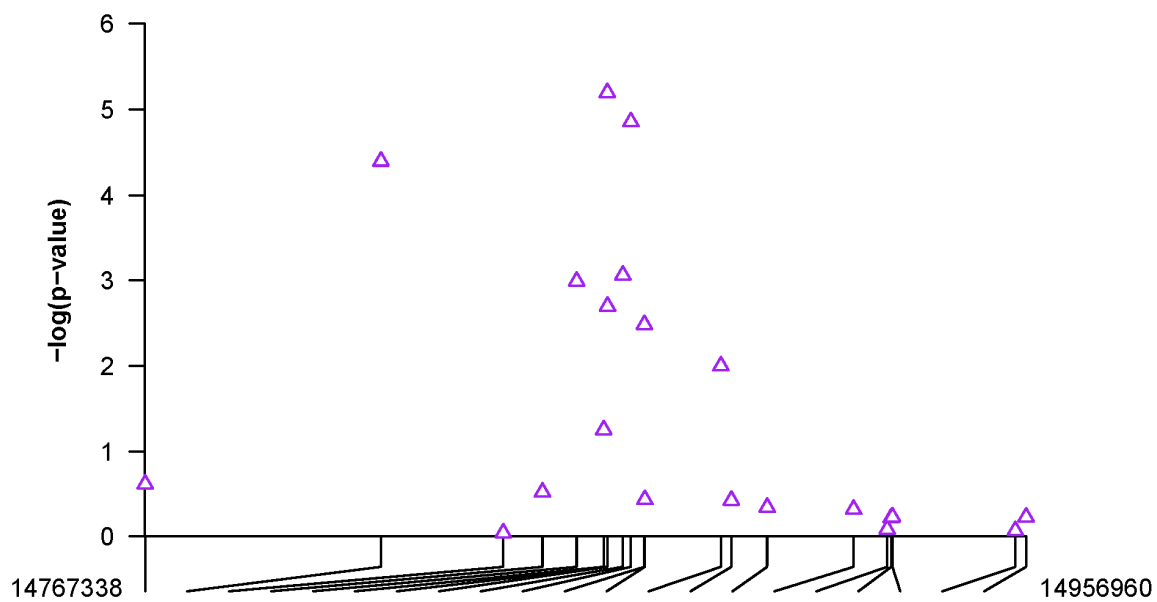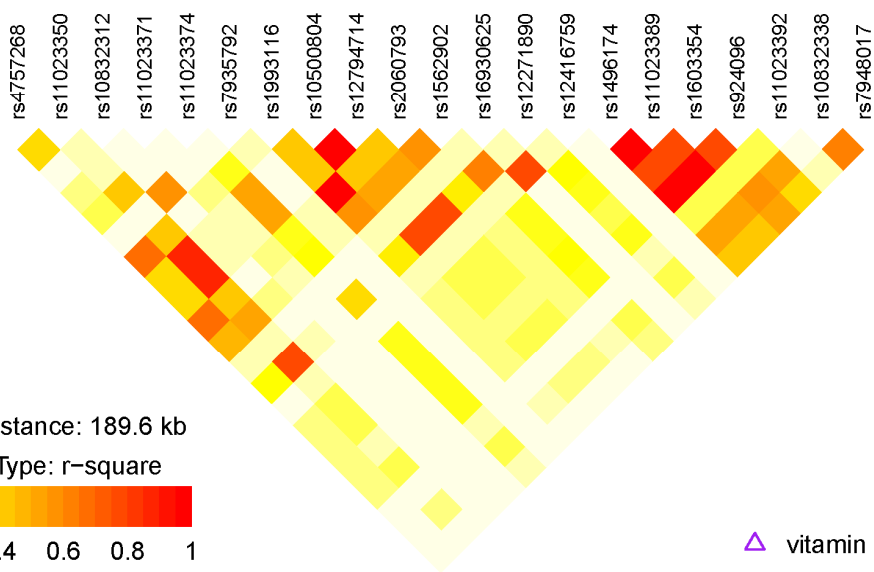

Supplement: ddq155_1.pdf [file ddq155_1.pdf]
