# Supplementary material for: Genome-wide association study of circulating vitamin D levels
Source: PubMed Central journal article supplement — Hum Mol Genet. 2010 Apr 23;19(13):2739–45. doi: 10.1093/hmg/ddq155 (PMC2883344; doi:10.1093/hmg/ddq155), 2010-04-23
Supplement: ddq155_2.pdf [file ddq155_2.pdf]

**Supplementary Table 1. Analysis based on controls only (ATBC, CPS-II, CLUE II, and PLCO combined; n=1,312)**

| SNP <sup>a</sup> | Risk allele (freq) | Chr | Location <sup>b</sup> | Gene neighborhood    | P-value <sup>c,d</sup> | Beta <sup>e</sup> | S.E. |
|------------------|--------------------|-----|-----------------------|----------------------|------------------------|-------------------|------|
| rs2282679        | C<br>(0.26)        | 4   | 72827247              | <i>GC</i>            | $1.4 \times 10^{-11}$  | -0.39             | 0.06 |
| rs3829251        | A<br>(0.19)        | 11  | 70872207              | <i>NADSYN1/DHRC7</i> | 0.11                   | -0.10             | 0.06 |
| rs6599638        | G<br>(0.49)        | 10  | 124694139             | <i>C10orf88</i>      | $4.0 \times 10^{-3}$   | -0.15             | 0.05 |
| rs2060793        | A<br>(0.41)        | 11  | 14866810              | <i>CYP2R1</i>        | 0.25                   | 0.06              | 0.05 |

**FOOTNOTES TO SUPPLEMENTARY TABLES 1 AND 2**

a. SNP identifier based on NCBI dbSNP

b. Chromosomal location based on NCBI Human Genome Build 35 coordinates

c. The result of 1 df test based on linear regression, using an additive model, after square root transformation of 25-hydroxy vitamin D levels – adjusted for age, vitamin D assay batch, study, case-control status, sex, body mass index, season of blood collection, vitamin D supplement intake, dietary vitamin D intake, region/latitude, and chosen eigenvectors to control population stratification.

d. The result of 1 df test based on logistic regression, using an additive model, – adjusted for age, vitamin D assay batch, study, case-control status, sex, body mass index, season of blood collection, vitamin D supplement intake, dietary vitamin D intake, region/latitude, and chosen eigenvectors to control population stratification.

e. The regression beta and standard error were based on the square root scale.

**Supplementary Table 2. Binary outcome for vitamin D clinical deficiency (<25 nmol/L) (ATBC, CPS-II, CLUE II, PLCO combined; n=2,907)**

| SNP <sup>a</sup> | Risk allele<br>(freq) | Chr | Location <sup>b</sup> | Gene<br>Neighborhood | P-value <sup>c</sup> | OR   |
|------------------|-----------------------|-----|-----------------------|----------------------|----------------------|------|
| rs2282679        | C (0.26)              | 4   | 72827247              | <i>GC</i>            | $6.5 \times 10^{-9}$ | 1.83 |
| rs3829251        | A (0.19)              | 11  | 70872207              | <i>NADSYN1/DHRC7</i> | 0.11                 | 1.18 |
| rs6599638        | G (0.49)              | 10  | 124694139             | <i>C10orf88</i>      | $8.1 \times 10^{-2}$ | 1.17 |
| rs2060793        | A (0.41)              | 11  | 14866810              | <i>CYP2R1</i>        | 0.21                 | 0.89 |

**Joint model: *GC* rs2282679 + *NADSYN1/DHCR7* rs3829251 + *C10orf88* rs6599638 + *CYP2R1* rs2060793. Odds ratio of having one copy of high risk allele at each of the four loci is 2.97 (95% CI 2.00 - 4.39). The joint effect from the four SNPs is significant ( $P = 3.2 \times 10^{-8}$ ).**
